1 Resistance to chemical carcinogenesis induction via a dampened  
2 inflammatory response in naked mole-rats

3

4 Kaori Oka<sup>a,b,1</sup>, Shusuke Fujioka<sup>a,b,1</sup>, Yoshimi Kawamura<sup>a,b,1</sup>, Yoshihiro Komohara<sup>c</sup>, Takeshi  
5 Chujo<sup>d</sup>, Koki Sekiguchi<sup>a</sup>, Yuki Yamamura<sup>a</sup>, Yuki Oiwa<sup>a,b</sup>, Natsuko Omamiuda-Ishikawa<sup>a</sup>, Shohei  
6 Komaki<sup>e</sup>, Yoichi Sutoh<sup>e</sup>, Satoko Sakurai<sup>f</sup>, Kazuhito Tomizawa<sup>d,g</sup>, Hidemasa Bono<sup>h</sup>, Atsushi  
7 Shimizu<sup>e,i</sup>, Kimi Araki<sup>g,j</sup>, Takuya Yamamoto<sup>f,k,l,m</sup>, Yasuhiro Yamada<sup>m,n</sup>, Hiroyuki Oshiumi<sup>o</sup>, and  
8 Kyoko Miura<sup>a,b,g\*</sup>

9

10 <sup>a</sup> Department of Aging and Longevity Research, Faculty of Life Sciences, Kumamoto University,  
11 Kumamoto 860-0811, Japan.

12 <sup>b</sup> Biomedical Animal Research Laboratory, Institute for Genetic Medicine, Hokkaido University,  
13 Sapporo 060-0815, Japan.

14 <sup>c</sup> Department of Cell Pathology, Faculty of Life Sciences, Kumamoto University, Kumamoto 860-  
15 8556, Japan.

16 <sup>d</sup> Department of Molecular Physiology, Faculty of Life Sciences, Kumamoto University,  
17 Kumamoto 860-8556, Japan.

18 <sup>e</sup> Division of Biomedical Information Analysis, Iwate Tohoku Medical Megabank Organization,  
19 Disaster Reconstruction Center, Iwate Medical University, Iwate 028-3694, Japan.

20 <sup>f</sup> Department of Life Science Frontiers, Center for iPS Cell Research and Application (CiRA),  
21 Kyoto University, Kyoto 606-8507, Japan.

22 <sup>g</sup> Center for Metabolic Regulation of Healthy Aging, Kumamoto University, Kumamoto 860-8556,  
23 Japan.

24 <sup>h</sup> Program of Biomedical Science, Graduate School of Integrated Sciences for Life, Hiroshima  
25 University, Hiroshima 739-0046, Japan.

26 <sup>i</sup> Division of Biomedical Information Analysis, Institute for Biomedical Sciences, Iwate Medical  
27 University, Iwate 028-3694, Japan.

28 <sup>j</sup> Institute of Resource Development and Analysis, Kumamoto University, Kumamoto 860-0811,  
29 Japan.

30 <sup>k</sup> Institute for the Advanced Study of Human Biology (WPI-ASHBi), Kyoto University, Kyoto 606-  
31 8501, Japan.

32 <sup>l</sup> Medical-risk Avoidance based on iPS Cells Team, RIKEN Center for Advanced Intelligence  
33 Project (AIP), Kyoto 606-8507, Japan.

34 <sup>m</sup> AMED-CREST, AMED, Tokyo 100-0004, Japan.

35 <sup>n</sup> Division of Stem Cell Pathology, Center for Experimental Medicine and Systems Biology,  
36 Institute of Medical Science, The University of Tokyo, Tokyo 108-8639, Japan.

37 <sup>o</sup> Department of Immunology, Faculty of Life Sciences, Kumamoto University, Kumamoto 860-  
38 8556, Japan.

39 <sup>1</sup> K.O., S.F. and Y. Kawamura contributed equally to this work.

40 \*Corresponding author: Kyoko Miura.

41 **Email:** [miurak@kumamoto-u.ac.jp](mailto:miurak@kumamoto-u.ac.jp)

42 **Author Contributions:** KO, SF, and Y Kawamura conducted most experiments; TC, KS, Y  
43 Yamamura, YO, NO-I, SK, YS, HB, and AS conducted certain experiments and analyses; Y  
44 Komohara and Y Yamada conducted histopathological analyses; SS and TY conducted RNA-seq  
45 analyses; HO analyzed sequences of components of necroptosis pathway; KA generated Ripk3  
46 KO mice; KO, SF, Y Kawamura, Y Yamada, HO, and KM contributed to the study design; SF,  
47 KO, Y Kawamura, TC, KT, and KM wrote the manuscript; KM supervised the project.

48 **Competing Interest Statement:** The authors declare that they have no competing interests.

49 **Keywords:** Naked mole-rat, Cancer, Inflammation, Necroptosis.

50

## 51 **Abstract**

52 Naked mole-rats (NMRs) have a very low spontaneous carcinogenesis rate, which has prompted  
53 scientists to study their cancer resistance mechanisms in order to provide clues for human cancer  
54 prevention. Although cancer resistance in NMRs has been intensively investigated at the cellular  
55 level, it is still unknown how strongly resistant NMR individuals are to carcinogenesis and how  
56 NMR tissues respond to experimental carcinogenesis induction. Here, we show that NMRs  
57 exhibit extraordinary resistance against potent chemical carcinogenesis induction through a  
58 dampened inflammatory response. Although carcinogenic insults damaged skin cells of both  
59 NMRs and mice, NMR skin showed markedly lower immune cell infiltration and reduced induction  
60 of inflammatory genes. NMRs harbor loss-of-function mutations in receptor-interacting protein  
61 kinase 3 (*RIPK3*) and mixed lineage kinase domain-like (*MLKL*) genes, which are essential for  
62 necroptosis, a type of necrotic cell death that activates strong inflammation. A necroptosis-  
63 inducing stimulus did not increase death of NMR cells. After carcinogenic insults, leakage of the  
64 HMGB1, a marker of necrotic cell death, was not increased in NMR skin. In mice, inhibition or  
65 knockout of *RIPK3* reduced immune cell infiltration and delayed the onset of chemical  
66 carcinogenesis. Therefore, necroptosis deficiency may serve as a cancer resistance mechanism  
67 via attenuating the inflammatory response in NMRs. Our study sheds light on the importance of a  
68 dampened inflammatory response as a non-cell-autonomous cancer resistance mechanism in  
69 NMRs. Further *in vivo* study of the unusual tissue immune system and carcinogenesis resistance  
70 of NMRs may lead to the development of new strategies to prevent carcinogenesis in humans.

## 71 **Significance Statement**

72

73 In contrast with intensive studies of cancer resistance mechanisms in naked mole-rats (NMRs) at  
74 the cellular level, little is known about how NMR individuals respond to carcinogenesis induction,  
75 despite the fact that cell-to-cell interactions in tissues regulate carcinogenesis *in vivo*. Here, we  
76 demonstrate that NMRs are remarkably resistant to chemical carcinogenesis induction and  
77 characteristically have attenuated tissue inflammatory responses to carcinogenic insults. NMRs  
78 have loss-of-function mutations in *RIPK3* and *MLKL* genes and thus cannot activate necroptosis,  
79 a type of inflammation-inducing cell death. *RIPK3* inhibition in mice reduced immune cell  
80 infiltration in response to carcinogenic insults and delayed the onset of chemical-induced

81 carcinogenesis. Our results highlight the importance of studies on dampened tissue inflammatory  
82 responses to understand cancer resistance of NMRs.

83

## 84 **Main Text**

85

### 86 **Introduction**

87

88 The naked mole-rat (NMR) is the longest-living rodent with a maximum lifespan of 37 years,  
89 despite being comparable size to the laboratory mice, and previous studies have reported that it  
90 is protected from age-associated declines in biological functions and aging-related disorders (1,  
91 2). In particular, spontaneous carcinogenesis has rarely been observed in over 2,000 necropsies  
92 of captive NMR colonies (3, 4). This provides clear evidence of the cancer resistance properties  
93 of NMRs; however, to the best of our knowledge, it is the only evidence to date of their cancer  
94 resistance in vivo. On the other hand, several recent reports demonstrated that some NMRs  
95 spontaneously develop cancers (5–7). Therefore, it is unclear how strongly resistant NMR  
96 individuals are to carcinogenesis. Moreover, there is no report regarding the tissue response of  
97 NMRs to experimental induction of carcinogenesis in vivo.

98 Intracellular mechanisms that may contribute to cancer resistance in NMRs have been  
99 proposed (8–10); however, whether NMR cells have strong cell-autonomous cancer resistance is  
100 currently debatable. There are two reports that NMR cells, in contrast to mouse cells, do not  
101 transform upon introduction of HRasV12 and SV40 Large T antigen (9, 11), and conversely  
102 another report involving extensive experiments that they do (12). One limitation of previous  
103 studies is that the findings are based on in vitro experimental transformation of cultured  
104 fibroblasts and their xenografts in immunodeficient mice.

105 In vivo carcinogenesis includes an initiation stage, in which DNA damage results in the  
106 generation of mutant cells. This is followed by changes in the tissue microenvironment around the  
107 mutant cells, which comprises surrounding immune cells and stromal cells. Microenvironmental  
108 changes regulate various environmental factors and promote carcinogenesis in a promotion stage  
109 (13, 14). In particular, tissue inflammation induces further genetic and epigenetic alterations of  
110 mutant cells and strongly promotes carcinogenesis in a non-cell-autonomous manner (15–18).  
111 Therefore, previous studies on the cancer resistance of cultured NMR fibroblasts might pay little  
112 attention to the physiological context of in vivo carcinogenesis and might overlook relevant cancer  
113 resistance mechanisms in NMR tissues.

114 Here, we show that NMR individuals exhibit extraordinary resistance to carcinogenesis  
115 induction by chemical carcinogens in vivo. Notably, NMR skin tissues showed an unusual  
116 dampened inflammatory response to carcinogenic insults. NMRs harbor loss-of-function  
117 mutations in receptor-interacting protein kinase 3 (*RIPK3*) and mixed lineage kinase domain-like  
118 (*MLKL*), the regulators of necroptosis, a type of strong inflammation-activating cell death  
119 associated with various inflammatory diseases (19). Loss of necroptosis-inducing ability in NMRs  
120 may serve as a mechanism that attenuates inflammatory responses and suppresses  
121 carcinogenesis in vivo. This study highlights a dampened tissue inflammatory response as a non-  
122 cell-autonomous mechanism underlying carcinogenesis resistance in NMR individuals.

123

## 124 **Results**

125

### 126 **NMRs show marked resistance to chemical carcinogenesis induction**

127

128 The in vivo responses of NMR tissues to carcinogenic insults were examined using two types of  
129 chemical carcinogens, and the effects were compared with those in mice. First, mice and NMRs  
130 received intramuscular injections of 3-methylcholanthrene (3MC), a carcinogen in various rodent  
131 species (20–22) (Fig. 1A). After treatment, all mice developed fibrosarcomas within 24 weeks (9/9  
132 tested animals; Fig. 1B, C). However, 3MC-treated NMRs did not develop tumors in a period of 114  
133 weeks (0/9 tested animals; Fig. 1B, C, and Fig. S1A). Histopathological analysis (three animals)  
134 showed no obvious abnormalities (Fig. 1C). The remaining animals were kept alive, and no visible

135 tumors were observed for 177 weeks. NMRs who received a subcutaneous injection of 3MC also  
136 did not develop visible tumors for 97 weeks (0/5 tested animals; Fig. 1D–F). No obvious  
137 histopathological abnormalities such as hyperplasia were detected although Ki67-positive cells  
138 tended to increase slightly (Fig. 1F and Fig. S1B). On the other hand, the mice developed severe  
139 skin ulcers and had to be euthanized within 10 weeks (Fig. S1C).

140 Next, other carcinogens, namely, 7,12-dimethylbenz[*a*]anthracene (DMBA) and 12-*O*-  
141 tetradecanoylphorbol-13-acetate (TPA) (23), were administered to the back skin of mice and NMRs  
142 (Fig. 1G). All mice developed multiple papillomas within 30 weeks (6/6 tested animals; Fig. 1H, I).  
143 On the other hand, NMRs did not develop any visible tumors at 55 weeks, and histopathological  
144 analysis of skin biopsies showed no obvious abnormalities, although Ki67-positive cells increased  
145 slightly (0/6 tested animals; Fig. 1H, I, and Fig. S1D). These animals continued to receive TPA and  
146 did not develop tumors for 116 weeks.

147

### 148 **Carcinogens increase tissue damage in NMRs**

149

150 To evaluate the early tissue responses to the carcinogen, 3MC was injected subcutaneously, and  
151 the effects were analyzed after 1 week (24) (Fig. 2A). NMR and mouse skin tissues showed  
152 increased phospho-histone H2A.X (pH2AX)-positive or 8-hydroxy-2'-deoxyguanosine (8-OHdG)-  
153 positive DNA-damaged cells in response to 3MC treatment, and TUNEL-positive dead cells were  
154 similarly increased (Fig. 2B, C and Fig. S2).

155 We then evaluated the tissue responses to DMBA at earlier stages (Fig. 2D). Similar to the  
156 effect of 3MC, DMBA treatment for 24 h significantly increased the number of pH2AX-positive DNA-  
157 damaged cells in both mouse and NMR skin (Fig. 2E, F). Taken together, these results demonstrate  
158 that treatment with carcinogenic agents increased tissue damage such as DNA damage and cell  
159 death in NMR tissues. Despite this increasing tissue damage, NMR individuals showed marked  
160 resistance against two types of chemical carcinogenesis induction.

161

### 162 **NMRs show dampened tissue inflammatory responses after carcinogenic insults**

163

164 The effect of chemical carcinogens on immune cell infiltration was evaluated by immunostaining  
165 using pre-validated antibodies against CD45 (leukocytes), IBA1 (macrophages), myeloperoxidase  
166 (MPO, myeloid cells: neutrophils and macrophages), and CD3 (T cells) (Fig. S3A and Dataset S1).  
167 In mice, 3MC treatment significantly increased the number of CD45-, IBA1-, and CD3-positive  
168 immune cells at 1 and 3 weeks (Fig. 3A–C, Fig. S4, and Fig. S5A, B). These data reflect the  
169 infiltration of inflammatory immune cells after carcinogen treatment in mouse tissues as previously  
170 reported (16, 17). By contrast, 3MC-treated NMR skin showed very low levels of several types of  
171 immune cell infiltration at 1 and 3 weeks. Analysis of NMR skin at 97 weeks after 3MC treatment  
172 showed no significant increase in CD45-positive immune cells (Fig. 3A–C, Fig. S4, and Fig. S5).  
173 Similar to the results regarding the effects of 3MC, DMBA/TPA-treated NMR skin at 2 weeks  
174 showed a very small increase in the number of several immune cell types in contrast with mice  
175 (Fig. 3D–F and Fig. S6A, B). The accumulation of immune cells was markedly attenuated in NMR  
176 skin after 55 weeks of DMBA/TPA treatment, including after 108 rounds of treatment with TPA, a  
177 potent inflammatory agent (Fig. 3F and Fig. S6C). These results indicate that infiltration of  
178 inflammatory immune cells was much lower in NMRs than in mice after exposure to two types of  
179 chemical carcinogens.

180

181 Furthermore, we evaluated skin tissue responses to UV irradiation, which promotes  
182 carcinogenesis by inducing DNA damage and inflammation in mice (16, 25) (Fig. S7A). UVB  
183 irradiation significantly increased skin thickness, the number of pH2AX-positive DNA-damaged  
184 cells, TUNEL-positive dead cells, and cleaved caspase-3-positive apoptotic cells in both mouse  
185 and NMR skin, indicating that tissue damage increases in both species (Fig. S7B, C). In mouse  
186 skin, UV irradiation resulted in significant increases in the numbers of CD45-, IBA1-, and MPO-  
187 positive inflammatory immune cells, whereas in NMR skin, UV irradiation resulted in very small  
188 increases in the numbers of CD45- and CD3-positive immune cells, and no significant increase in  
189 IBA1- or MPO-positive immune cells (Fig. S8). These results indicate that the accumulation of

189 inflammatory immune cells in response to various cancer-promoting stimuli is attenuated in NMRs,  
190 despite the induction of tissue damage such as DNA damage and cell death.

191 Next, we evaluated infection-associated inflammatory responses in NMRs (Fig. S9A).  
192 Subcutaneous injection of bacterial lipopolysaccharide (LPS), which reportedly activates NMR  
193 immune cells (26), increased interleukin-6 (*IL6*) expression, as well as the number of CD45- and  
194 MPO-positive immune cells in both mouse and NMR skin (Fig. S9B–D). Intraperitoneal LPS  
195 injection significantly increased the number of IBA1-positive cells in NMR livers (Fig. S10A). Thus,  
196 NMR immune cells can infiltrate into tissues in response to bacterial virulence factors. When co-  
197 cultured with dead NMR fibroblasts, NMR macrophages exhibited normal phagocytic activity of  
198 dead cells (Fig. S10B) despite showing reduced infiltration into carcinogen-treated damaged  
199 tissues.

200 During these experiments, we observed that the number of immune cells was lower in  
201 control NMR skin than in control mouse skin. To provide a context for this, we examined the number  
202 of tissue-resident immune cells in liver, skin, and intestine from mice, rats, guinea pigs, and NMRs.  
203 We found that the number of IBA1- or CD3-positive immune cells was lower in some NMR tissues,  
204 suggesting unique tissue immune homeostasis in NMRs (Fig. S11, S3).

205 To investigate the overall inflammatory responses to 3MC, UV, and LPS treatment, we  
206 performed global gene expression analysis using RNA-sequencing (RNA-seq). Changes in global  
207 gene expression or in selected ligand genes important for cell-to-cell communication, including  
208 many chemokines and cytokines (27), in response to the different treatments were greater in mouse  
209 skin than in NMR skin, and the upregulations were particularly large in the 3MC- and UV-treated  
210 mouse groups (Fig. S12A, B and Dataset S2). Cell type enrichment analysis using xCell (28)  
211 showed that all treatments significantly increased several immune cell enrichment scores in mouse  
212 skin (Fig. S12C and Dataset S3). By contrast, in NMR skin, 3MC and UV treatment did not  
213 significantly change the immune cell enrichment scores, whereas LPS did (Fig. S12C and Dataset  
214 S3). These results are consistent with those of immunohistochemical analyses of immune cell  
215 markers (Fig. 3 and Figs. S4, S5, S6, S8, S9), and confirm that inflammatory responses to cancer-  
216 promoting stimuli are attenuated in NMR tissues.

217

### 218 **Loss-of-function mutations in necroptosis regulators in NMRs may contribute to the** 219 **attenuated tissue inflammatory response and carcinogenesis resistance**

220

221 To examine the mechanisms underlying the different responses of NMR tissues to cancer-  
222 promoting stimuli, we analyzed differentially expressed genes (DEGs) in response to 3MC and UV  
223 treatment that differed from DEGs in response to LPS treatment between mice and NMRs. We  
224 selected genes that were species-specifically upregulated by >2 fold in NMRs or mice after both  
225 3MC and UV treatment, but that were not commonly upregulated after LPS treatment (Fig 4A, blue-  
226 filled area, collectively termed 3MC-UV Mouse-DEGs and Fig. S13A, purple-filled area, collectively  
227 termed 3MC-UV NMR-DEGs). Enrichment analysis of the selected DEGs was performed using  
228 Metascape (29). Among 3MC-UV NMR-DEGs, genes related to the Kyoto Encyclopedia of Genes  
229 and Genomes (KEGG) pathway “p53 signaling pathway” were highly enriched, suggesting  
230 activation of the p53 pathway in 3MC- and UV-treated NMR skin (Fig. S13A and Dataset S4). This  
231 was consistent with the immunostaining data showing increased DNA damage and cell death in  
232 3MC- and UV-treated NMR skin (Fig. 2B, C, and Fig. S2, S7). Among 3MC-UV Mouse-DEGs,  
233 genes related to the KEGG pathway “Cytokine-cytokine receptor interaction” and the gene ontology  
234 (GO) term “Leukocyte migration” were highly enriched, indicating the activation of inflammatory  
235 responses in 3MC- and UV-treated mouse skin (Fig. 4A and Dataset S4).

236 Notably, among 3MC-UV Mouse-DEGs, genes related to the KEGG pathways “RIPK1-  
237 mediated regulated necrosis” (necroptosis) and “Regulation of cell killing” were the most  
238 significantly enriched (Fig. 4A and Dataset S4), which were not observed among 3MC-UV NMR-  
239 DEGs. Necroptosis, a type of programmed necrotic cell death, triggers inflammation, and promotes  
240 colon and pancreatic cancer development (14, 30–32). Thus, we hypothesized that inactivation of

241 necroptosis in NMRs may underlie the attenuated inflammatory responses in NMRs, possibly  
242 leading to cancer resistance.

243 The RIPK1-RIPK3 complex induces necroptosis via the necroptosis effector, MLKL (33–  
244 35). We found that the NMR genome harbors a two-nucleotide insertion in the *RIPK3* gene and a  
245 two-nucleotide deletion in the *MLKL* gene, both of which cause frame-shift mutations and introduce  
246 premature stop codons (Fig. 4B). These alterations remove the RHIM domain in RIPK3 and the  
247 pseudokinase domain in MLKL, which are both functionally essential for necroptosis in other  
248 mammalian species (36). Because NMR *RIPK3* and *MLKL* genes have premature stop codons  
249 located before the final exon, the transcripts from these two genes are putative targets for  
250 nonsense-mediated mRNA decay (NMD) (37). As NMR *RIPK3* mRNA was expressed in the skin  
251 (Fig. S13B, C), we examined whether NMR *RIPK3* is degraded by NMD. RT-qPCR analysis of  
252 NMR fibroblasts treated with actinomycin D (ActD, a transcriptional inhibitor) and/or cycloheximide  
253 (CHX, a translational inhibitor that potentially inhibits NMD) showed that NMR *RIPK3* transcripts  
254 exhibited relatively low steady-state levels after ActD treatment, whereas the *RIPK3* mRNA level  
255 increased upon CHX treatment (Fig. S13D). This result indicates that NMR *RIPK3* mRNA is  
256 degraded by NMD. NMR *MLKL* mRNA expression was not detected in the skin (Fig. S13E–G).  
257 Although previous studies have shown that only the N-terminal 4- $\alpha$  helical bundle domain of  
258 MLKL can cause spontaneous cell death depending on the cellular context (38–40), NMR MLKL  
259 could not induce spontaneous cell death (Fig. S14A, B). Thus, the genes essential for necroptosis  
260 induction are likely to be defective in NMRs.

261 To evaluate whether necroptosis is impaired in NMRs, we performed experimental  
262 necroptosis induction in vitro. In mouse fibroblasts, treatment with tumor necrosis factor- $\alpha$  (TNF-  
263  $\alpha$ ), CHX, and z-VAD-fmk (caspase inhibitor) caused massive cell death, which was inhibited by  
264 necrostatin-1 (Nec1, RIPK1 inhibitor), as previously reported (41), indicating activation of  
265 necroptosis (Fig. 4C). In contrast to mouse fibroblasts, NMR fibroblasts did not show increased cell  
266 death in response to TNF- $\alpha$  + CHX or TNF- $\alpha$  + CHX + z-VAD-fmk, although TNF- $\alpha$  upregulated  
267 *IL6* (42) as observed in mice (Fig. 4C and Fig. S14C). These results suggest that NMR cells are  
268 incapable of inducing TNF- $\alpha$ -mediated necroptosis and apoptosis, although they are capable of  
269 inducing DNA damage-induced caspase-3-dependent apoptosis (Fig. S14D–F). In mice, RIPK3 is  
270 important for the induction of both necroptosis and TNF-induced apoptosis mediated by RIPK1  
271 (43). Thus, the loss-of-function mutation of *RIPK3* in NMRs may contribute to their inability to  
272 undergo necroptosis and TNF-induced apoptosis mediated by RIPK1.

273 Generally, necroptosis triggers inflammation through the release of various cellular  
274 components such as high mobility group box-1 protein (HMGB1) (44), which can be observed  
275 during cancer progression (16, 17). 3MC, DMBA, and UV treatment did not significantly alter  
276 cytoplasmic HMGB1 translocation in NMR skin, in contrast to the significant increase observed in  
277 mouse skin (Fig. 4D, E and Fig. S15). These results further support the idea that the inability to  
278 induce necroptosis in NMRs may contribute to the dampened immune cell responses to  
279 carcinogenic stimuli.

280 Next, we assessed whether the necroptosis inhibitor (45) GSK'872, a RIPK3 inhibitor, or  
281 disruption of the *Ripk3* gene could suppress the 3MC-induced inflammatory response in mice and  
282 impede carcinogenesis as observed in NMRs (Fig. 4F and Fig. S16, S17A). The results of western  
283 blotting showed that 3MC treatment activated the MLKL protein (as indicated by MLKL  
284 phosphorylation), and MLKL activation was suppressed by GSK'872 treatment (Fig. S17B).  
285 GSK'872 and disruption of the *Ripk3* gene significantly suppressed cytoplasmic HMGB1  
286 translocation (Fig. S17C), indicating that necroptosis was successfully suppressed. In addition,  
287 both manipulations reduced the infiltration of inflammatory immune cells in 3MC-treated mouse  
288 skin (Fig. S17D). Finally, we evaluated the effect of GSK'872 treatment or *Ripk3* knockout on 3MC-  
289 induced chemical carcinogenesis in mice (Fig. 4F). Continuous administration of GSK'872 or  
290 disruption of the *Ripk3* gene significantly delayed the onset of carcinogenesis in 3MC-treated mice  
291 (Fig. 4G;  $P = 0.0423$  for GSK'872;  $P = 0.0228$  for *Ripk3* KO mice; Gehan–Breslow–Wilcoxon test).  
292 Thus, in mice, the suppression of the necroptosis regulator attenuated immune cell infiltration and  
293 chemical carcinogenesis. This result is consistent with our assumption that the absence of

294 necroptosis regulators in NMRs may contribute to the reduced inflammatory response and  
295 resistance to chemical carcinogenesis.

296

## 297 Discussion

298

299 In this study, NMRs showed marked resistance to two types of chemical carcinogenesis induction  
300 in vivo. The distinctive feature of the NMR tissue response to carcinogenic insults was an unusual  
301 dampened inflammatory response, which may serve as a non-cell-autonomous cancer resistance  
302 mechanism in NMR individuals. Inhibition of RIPK3 in mice resulted in the reduced inflammatory  
303 response and the delayed onset of carcinogenesis (Fig. S18). Therefore, we propose that one of  
304 the mechanisms underlying the attenuated tissue inflammatory response and remarkable cancer  
305 resistance of NMRs may be specific loss-of-function mutations in the necroptosis regulators  
306 *RIPK3* and *MLKL*.

307 In a different cancer-resistant rodent, the blind mole-rat, the same dose of 3MC causes  
308 low frequency carcinogenesis (~9%) (22, 46). Thus, NMRs are especially resistant to chemical  
309 carcinogenesis. In contrast to NMRs, 3MC induces massive inflammation in blind mole-rats (22).  
310 This distinct difference in inflammatory responses between NMRs and blind mole-rats, both of  
311 which show spontaneous cancer resistance and a high DNA repair capacity (47–49), may  
312 contribute to the differences in resistance to in vivo carcinogenesis induction.

313 The attenuated cancer-promoting tissue inflammatory response may act as a gatekeeper  
314 to prevent carcinogenesis in NMRs. This is supported by previous reports showing that toll-like  
315 receptor 4 knockout mice exhibit carcinogenic resistance owing to dampened inflammatory  
316 responses (16, 17). Other mechanisms besides the deficiency in necroptosis, especially those  
317 related to immune cell characteristics, might also contribute to the unique inflammatory response  
318 in NMRs. Immune homeostasis in NMRs may be unusual because the resident immune cells,  
319 which contribute to the attenuated immune response and to cancer resistance in mice (50, 51),  
320 were less numerous in some tissues of NMRs than in those of other rodent species (Fig. S11).  
321 Moreover, a single cell RNA-seq study of immune cells revealed the unique immune system of  
322 NMRs, which is characterized by a lack of natural killer cells (26). Recent in silico and in vitro  
323 studies have shown that cancer-resistant bats lack certain immunity-related genes (52, 53).  
324 Future studies examining the immune system of cancer-resistant animals should improve our  
325 understanding of their cancer resistance mechanisms.

326 The type of cell death and its modulation play critical roles in the regulation of  
327 inflammation and homeostasis in vivo. In this study, caspase-3-dependent apoptosis occurred in  
328 NMRs, whereas necroptosis did not (Fig. 4C–E, Fig. S7B, C, Fig. S14D–F, and Fig. S15). Since  
329 the pro-inflammatory potential of necroptosis is markedly higher than that of apoptosis (44), the  
330 suppression of necroptosis may contribute substantially to the attenuation of the inflammatory  
331 response in NMR tissues as in *RIPK3* inhibited/disrupted mice. Necroptosis is involved in a  
332 variety of inflammatory age-related diseases/disorders, such as ischemia-reperfusion injury,  
333 atherosclerosis, and neurodegenerative diseases. On the other hand, necroptosis also plays an  
334 important role in innate immunity during infectious diseases (19). Notably, NMRs are resistant not  
335 only to cancer, but also to aging-related declines in biological function, neurodegenerative  
336 disease, and ischemia-reperfusion injury, although they exhibit high susceptibility to herpes virus  
337 infection (3, 54–56). It is possible that deficiency in necroptosis induction may constitute an  
338 important part of the mechanisms responsible for the unusual characteristics of NMRs. It would  
339 also be interesting to study how other types of cell death, such as ferroptosis and pyroptosis, are  
340 regulated in NMRs.

341 Recent studies have shown that *RIPK3* is involved not only in the induction of necroptosis  
342 and *RIPK1*-mediated apoptosis, but also in the activation of the *NLRP3* inflammasome,  
343 maturation of *IL-1 $\beta$* , and production of inflammatory cytokines, all of which are not directly  
344 activated via necroptosis (57). *MLKL* contributes to various biological functions, such as  
345 endosomal trafficking and extracellular vesicle formation, in addition to the induction of  
346 necroptosis and inflammatory cytokines (58). Therefore, the loss-of-function mutations of *RIPK3*  
347 and *MLKL* in NMRs may affect not only necroptosis, but also the attenuation of the tissue

348 inflammatory response via suppression of the NLRP3 inflammasome and various other biological  
349 processes in vivo. This will require further analysis.

350 In addition to the role of cancer-promoting inflammation, the generation of mutant cells is  
351 also crucial for the initiation of carcinogenesis (59). Although carcinogen treatment damaged DNA  
352 and cells in NMR skin (Fig. 2 and Fig. S2, S7), it is possible that NMRs are protected against  
353 mutant cell generation or efficiently eliminate mutant cells. Possible explanations include 1)  
354 inhibition of mutant cell generation via several mechanisms, such as the previously reported  
355 efficient DNA double-strand break repair (48), or 2) elimination of mutant cells by unknown  
356 mechanisms, which may synergistically contribute to the in vivo cancer resistance of NMRs.

357 The present results demonstrate the importance of research into the unusual tissue  
358 immune response and extraordinary resistance to carcinogenesis of NMR individuals. Further  
359 insight into the tissue responses of the NMR to carcinogenic insults may lead to the development  
360 of new anticancer strategies for humans.

361

362

## 363 **Materials and Methods**

364

### 365 **Animals**

366 NMRs were maintained at Kumamoto University and Hokkaido University. All NMRs (8–31  
367 months) used in this research were raised in rooms that were maintained at 30°C ± 0.5°C and  
368 55% ± 5% humidity with 12 h light and 12 h dark cycles (10). The NMRs used in this study are  
369 listed in Dataset S5. Male C57BL/6N mice (8–10 weeks) were purchased from CLEA Japan, and  
370 *Ripk3* knockout (KO) mice were generated by deletion of the *Ripk3* gene. Wild-type mice and KO  
371 mice were kept in rooms that were maintained at 24.5°C ± 1.5°C and 50% ± 10% humidity with  
372 12 h light and 12 h dark cycles. Male rats (Wistar, 6 months) and guinea pigs (Hartley, 6 months)  
373 were purchased from Japan SLC. The Ethics Committees of Kumamoto University (approval no.  
374 A30-043 and A2020-042) and Hokkaido University (14-0065) approved all procedures, which  
375 were in accordance with the Guide for the Care and Use of Laboratory Animals (United States  
376 National Institutes of Health, Bethesda, MD, USA).

377

### 378 **Generation of *Ripk3* knockout mice and genotyping**

379 *Ripk3* KO mice were generated by introduction of the Cas9 protein (317–08441; NIPPON GENE),  
380 tracrRNA (GE-002; FASMAC), synthetic crRNA (FASMAC), and ssODN into C57BL/6N fertilized  
381 eggs by electroporation. For generating the *Ripk3* KO allele, the synthetic crRNAs were designed  
382 according to the sequence AAGAGAGACTGGCTATCGTG (GGG) of the 5' upstream region of  
383 *Ripk3* and ACTAGGAGAGGATCCCACTG (AGG) in the *Ripk3* intron 9. The ssODN 5'-  
384 CGACTTTCTTTTCGTTGTGTGACCTCAGttttatttGATAGCCAGTCTCTCTTGGACCCCTTAGCTCC  
385 ACC-3' was used as a homologous recombination template.

386 The electroporation solution contained 10 μM tracrRNA, 10 μM synthetic crRNA, 0.1  
387 mg/mL Cas9 protein, and 1 μg/μL ssODN in Opti-MEM I Reduced Serum Medium (31985062;  
388 Thermo Fisher Scientific). Electroporation was performed using the Super Electroporator NEPA  
389 21 (NEPA GENE) on glass microslides with round wire electrodes (1.0 mm gap [45–0104; BTX]).  
390 Four steps of square pulses were applied [1], three times of 3 mS poring pulses with 97 mS  
391 intervals at 30 V; 2], three times of 3 mS polarity-changed poring pulses with 97 mS intervals at  
392 30 V; 3], five times of 50 mS transfer pulses with 50 mS intervals at 4 V with 40% decay of  
393 voltage per pulse; 4], five times of 50 mS polarity-changed transfer pulses with 50 mS intervals at  
394 4 V with 40% decay of voltage per pulse).

395 The targeted *Ripk3* KO allele in F0 mice was identified by genomic PCR using the  
396 following primers: *Ripk3* KO F: 5'- AGCGACACCTTGTGATCTCC-3' and *Ripk3* KO R: 5'-  
397 CTGGCCCAAGACAACCCTTA -3' for the knockout allele (396 bp); *Ripk3* Wild F: 5'-  
398 GGAAAAGTCAGCCAATCCCG -3' and *Ripk3* Wild R: 5'- GCAAGACTAGAGCACACCCTC -3' for  
399 the wild-type allele (375 bp).

400

### 401 **3MC treatment**



402 C57BL/6N mice (average body weight, 24.0 g), NMRs (average body weight, 26.6 g), and *Ripk3*  
403 KO mice were intramuscularly or subcutaneously injected with 3MC (Sigma-Aldrich; 1 mg  
404 dissolved in 100  $\mu$ L corn oil) into the hindlimbs or back skin (60). Animals were observed weekly  
405 until tumors >15 mm in diameter developed at the injected sites, at which point the animals were  
406 sacrificed humanely using isoflurane anesthesia, and the tumors were used for further analysis.  
407 For NMRs, muscle samples (3MC-injected sites and opposite sites as controls) collected after  
408 114 weeks and skin samples collected after 97 weeks were used for histopathological analysis.

409 To evaluate responses to short exposure to 3MC, 3MC (1 mg dissolved in 100  $\mu$ L corn  
410 oil) was subcutaneously injected into the back skin of C57BL/6N mice or NMRs, and the site was  
411 examined at 1 or 3 weeks after injection. Injected sites (100 mm<sup>2</sup>) were collected and used for  
412 further analysis. To suppress RIPK3 activity, GSK'872 (31, 45) (SelleckBio; 1 mg/kg body weight  
413 dissolved in saline) was intraperitoneally injected three times a week from 1 week before 3MC  
414 treatment until the end point of the experiment.

415

#### 416 **DMBA/TPA treatment**

417 C57BL/6N mice and NMRs were treated with DMBA (Sigma-Aldrich; 100  $\mu$ g in 100  $\mu$ L acetone)  
418 on the back skin. One week after DMBA treatment, animals were treated twice a week with TPA  
419 (Cayman Chemical; 12.5  $\mu$ g in 100  $\mu$ L acetone) until tumor formation was observed (61). Animals  
420 were observed daily until tumors >7 mm in diameter developed on the skin, at which point the  
421 animals were sacrificed humanely by isoflurane anesthesia, and the tumors were used for further  
422 analysis. For NMRs, skin biopsies were performed under isoflurane anesthesia at 55 weeks, and  
423 samples were used for histopathological analysis. For histopathological analysis, one individual  
424 who had an external wound possibly due to fighting was excluded as previously described (23).

425 To evaluate responses to short exposure to DMBA, DMBA (100  $\mu$ g in 100  $\mu$ L acetone)  
426 was administered to the back skin, and skin biopsies were performed after 24 h. To evaluate  
427 responses to short exposure to DMBA/TPA, DMBA (100  $\mu$ g in 100  $\mu$ L acetone) was administered  
428 to the back skin, and 1 week after DMBA treatment, animals were subsequently treated three  
429 times with TPA (12.5  $\mu$ g in 100  $\mu$ L acetone). Skin biopsies were performed 1 week after starting  
430 TPA treatment.

431

#### 432 **Hematoxylin and eosin (HE) staining and immunohistochemical analysis**

433 Histological examination was performed at K.I. Stainer, Inc. (Kumamoto, Japan). Briefly, the  
434 samples were fixed in 4% paraformaldehyde in phosphate-buffered saline (PBS), embedded in  
435 paraffin, and cut into 4  $\mu$ m sections; HE staining was routinely performed. The antibodies and  
436 protocols are listed in Dataset S1. Briefly, for immunostaining, the sections were deparaffinized  
437 using xylene and rehydrated with a graded series of ethanol. Antigen retrieval was performed by  
438 heat-induced epitope retrieval in citrate buffer or Tris buffer, or by enzymatic retrieval using  
439 proteinase K (62). The sections were incubated with 1% bovine serum albumin in Tris-buffered  
440 saline with 0.1% NaN<sub>3</sub> for blocking, and stained with primary antibodies against CD45 (Abcam,  
441 ab10558), MPO (DAKO, A0398), IBA1 (FUJIFILM WAKO, 019-19741), CD3 (Nichirei, 413591),  
442 Ki67 (Abcam, ab16667), 8-OHdG (Santa Cruz Biotechnology, sc-393871), pH2AX (Cell Signaling  
443 Technology [CST], 9718), or HMGB1 (Abcam, ab79823). The sections were incubated with  
444 horseradish peroxidase (HRP)-conjugated anti-rabbit, anti-mouse, or anti-rat secondary  
445 antibodies (Nichirei) as a secondary antibody. Positive signals were visualized using HistoGreen  
446 substrate (Cosmo Bio) for staining of immune cells in the skin (because it is not easy to  
447 distinguish diaminobenzidine (DAB)-stained cells from dermal melanin pigments in NMR skin in  
448 limited-sized figures) or DAB (Nichirei). For HMGB1, Alexa Fluor 555 anti-rabbit IgG (CST,  
449 A21429) secondary antibody was used. Nuclei were counterstained with hematoxylin (for CD45,  
450 MPO, IBA1, CD3, Ki67, 8-OHdG, and pH2AX) or Hoechst 33258 (Sigma-Aldrich) for HMGB1.  
451 For cleaved caspase-3, 10  $\mu$ m fresh-frozen sections were fixed with 4% PFA, washed with PBS,  
452 and blocked with 5% normal goat serum in 0.3% Triton X-100 (Nacalai Tesque) in PBS. The  
453 sections were incubated with primary antibodies against cleaved caspase-3 (CST; 9664; 1:400) in  
454 Can Get Signal Solution B (TOYOBO). The sections were stained with Alexa Fluor 555 anti-rabbit

455 IgG (CST; A21429; 1:1000) as a secondary antibody, and nuclei were stained with 1  $\mu$ g/mL  
456 Hoechst 33258 (Sigma-Aldrich).

457 The images were captured using a BZ-X 710 fluorescence microscope (KEYENCE) and  
458 analyzed using a BZ-X image analyzer (KEYENCE).

459

#### 460 **TUNEL staining**

461 For TUNEL staining, 4  $\mu$ m paraffin sections were deparaffinized and rehydrated as described  
462 above. The sections were stained using the TUNEL Assay Kit BrdU-Red (Abcam) according to  
463 the manufacturer's instructions. Nuclei were counterstained with Hoechst 33258. The images  
464 were captured using a BZ-X 710 fluorescence microscope and analyzed using a BZ-X image  
465 analyzer (KEYENCE).

466

#### 467 **Morphometric analyses of skin inflammatory responses**

468 Epidermal thickness was quantified by calculating the mean length of skin surface to the  
469 epidermal junction by five hand-drawn line segments per field (four fields were analyzed per  
470 animal) using ImageJ. Positive cells identified by immunostaining and TUNEL staining were  
471 quantified by counting the mean number of cells in each of the four images of one section from  
472 more than three animals per experiment, and were normalized to the total number of cells (for  
473 Ki67, TUNEL, pH2AX, 8OHdG, cleaved caspase-3, CD45, IBA1, MPO, and CD3) or to the tissue  
474 area (for CD45, IBA1, MPO, and CD3). The quantification was performed by three independent  
475 investigators including a pathologist (Y. Komohara). Total cells, either Hoechst or hematoxylin-  
476 positive nuclei (at least 350 cells per animal) and tissue area (bright field), were measured using  
477 a Hybrid Cell Count application (KEYENCE) in a BZ-X image analyzer.

478 Cytoplasmic HMGB1-positive cells were quantified by counting the mean number of cells  
479 in highly magnified sections from more than three animals per experiment, and normalized to the  
480 number of total HMGB1-positive cells (at least four images from one section per animal, >100  
481 cells). The quantification was performed by two independent investigators.

482

#### 483 **UV irradiation**

484 UV irradiation on the back skin of C57BL/6N mice and NMRs was performed every other day for  
485 12 days with a dose of 1,000 J/m<sup>2</sup> using a UV lamp (UVP UVM-28; Analytic Jena) for the times  
486 indicated in Fig. S7A (25). Prior to irradiation, the back skin of C57BL/6N mice was shaved. At 24  
487 h after final irradiation, the animals were sacrificed humanely using isoflurane anesthesia, and the  
488 skin samples were used for further analysis.

489

#### 490 **LPS treatment**

491 C57BL/6N mice and NMRs were subcutaneously or intraperitoneally injected with LPS (Sigma-  
492 Aldrich; 10 mg/kg body weight dissolved in saline). After 24 h of treatment, the animals were  
493 sacrificed humanely using isoflurane anesthesia, and skin or liver samples were used for further  
494 analysis.

495

#### 496 **RNA isolation and quantification of gene expression**

497 Total RNA was extracted using the RNeasy Plus Mini Kit (Qiagen, for cells) or TRIzol (Thermo  
498 Fisher Scientific, for tissues) according to the manufacturer's protocol. The gDNA Eliminator Spin  
499 Column (Qiagen) or TURBO DNA-free™ Kit (Invitrogen) was used for genomic DNA elimination  
500 according to the manufacturer's protocol. Reverse transcription reactions were performed with  
501 ReverTra Ace qPCR RT Master Mix (TOYOBO) using 300 ng total RNA as a template. The  
502 resulting cDNA was used for reverse transcription polymerase chain reaction (RT-PCR) and  
503 quantitative reverse transcription PCR (RT-qPCR). For RT-PCR, 24 cycles (for *actin beta* [*ACTB*])  
504 or 35 cycles (for *MLKL*) of amplification were performed under the following conditions using  
505 PrimeSTAR Max DNA Polymerase (Takara): denaturing at 98°C for 10 s, annealing at 55°C for  
506 30 s, and extension at 72°C for 30 s. The DNA fragments were electrophoresed in 2% agarose  
507 gels. RT-qPCR analysis was performed using Thunderbird SYBR qPCR Mix (TOYOBO) or

508 PowerUp SYBR Green Master Mix (Thermo Fisher Scientific) on a CFX384 Touch Real-Time  
509 PCR Detection System (Bio-Rad) with the primers listed in Dataset S6 (63).

510

### 511 **Cell culture**

512 Primary NMR or mouse skin fibroblasts were obtained from the back skin of 1–2-year-old NMRs  
513 or 6–8-week-old C57BL/6N mice (10). The cells were cultured in Dulbecco's modified Eagle's  
514 medium (Sigma-Aldrich) supplemented with 15% fetal bovine serum (FBS) (for NMR fibroblasts)  
515 or 10% FBS (for mouse fibroblasts) (Gibco), 1% penicillin/streptomycin (FUJIFILM WAKO), 2 mM  
516 L-glutamine (FUJIFILM WAKO), and 0.1 mM non-essential amino acids (FUJIFILM WAKO) at  
517 32°C in a humidified atmosphere containing 5% O<sub>2</sub> and 5% CO<sub>2</sub>. We used the fibroblasts within  
518 five passages. The medium was replaced every 2 days. For investigation of NMD, NMR  
519 fibroblasts were incubated with 5 µg/mL ActD (Sigma-Aldrich) and/or 30 µg/mL CHX (FUJIFILM  
520 WAKO) for 4 h. NMR fibroblasts treated with DMSO served as the control. After treatment, total  
521 RNA was isolated and used for RT-qPCR as described above.

522

### 523 **Lentiviral overexpression of NMR-MLKL**

524 Because NMR MLKL mRNA was not expressed in NMR skin, the coding sequence of NMR-  
525 MLKL was artificially synthesized based on the NCBI sequence information and our genomic  
526 sequencing results (XM\_021256495.1 and Fig. 4B) (Eurofins Genomics) and inserted into the  
527 lentiviral vector pCSII-EF-RFA-hyg (kindly provided by H. Naka-Kaneda). Then, the pCSII-EF-  
528 NMR-MLKL plasmid and packaging vectors (pCMV-VSV-G-RSV-Rev and pCAG-HIVgp) (64)  
529 were used to transfect 293T cells using a polyethylenimine MAX transfection reagent (CosmoBio)  
530 according to the manufacturer's instructions. The conditioned medium containing viral particles  
531 was concentrated by ultracentrifugation and used for viral transduction into NMR SV40ER cells,  
532 an NMR skin fibroblast cell line expressing simian virus 40 early region (65). The infected cells  
533 were passaged and subjected to propidium iodide (PI) staining as follows.

534

### 535 **Necroptosis assay**

536 Primary mouse or NMR fibroblasts were seeded at  $1 \times 10^4$  cells/well onto 24-well plates and  
537 stimulated with TNF- $\alpha$  (PeproTech; 50 ng/mL), z-VAD-fmk (Abcam; 20 µM), CHX (1 µg/mL), and  
538 Nec-1 (Sigma-Aldrich; 20 µM). After 24 h, cells were stained with Hoechst 33342 (DOJINDO; 1  
539 µg/mL) for 10 min at 32°C. Then, the cells were stained with PI (FUJIFILM Wako; 10 µg/mL) for 5  
540 min at 32°C. Images were captured using a BZ-X 710 fluorescence microscope (KEYENCE), and  
541 the number of cells positive for PI or Hoechst 33342 was counted (at least 100 cells per  
542 treatment) using a BZ-X image analyzer (KEYENCE). PI and Hoechst 33342 double-positive cells  
543 were regarded as dead cells.

544

### 545 **Etoposide treatment**

546 NMR fibroblasts were exposed to etoposide at 200 µM for 4 days. Etoposide-containing medium  
547 was added to subconfluent fibroblasts. After 2 days, the medium was replaced by freshly  
548 prepared etoposide-containing medium for an additional 2 days. Then, the cells were collected for  
549 Annexin V/PI analysis and western blotting.

550

### 551 **Flow cytometry analysis for apoptosis detection**

552 The FITC Annexin V Apoptosis Detection Kit (BD Biosciences or BioLegend) was used for the  
553 detection of apoptosis. Primary NMR skin fibroblasts were stained according to the  
554 manufacturer's protocols and analyzed on a FACSVerse (BD Biosciences) flow cytometer.

555

### 556 **Phagocytosis assay**

557 NMRs and mice were sacrificed humanely using isoflurane anesthesia, and limbs were isolated.  
558 After removing muscles and cartilage tissue, the bones were crushed and suspended in PBS.  
559 The cell suspension was filtered through a 70 µm cell strainer (Falcon) and suspended in hypo-  
560 osmotic solution to remove red blood cells. The remaining cells after hemolysis were processed  
561 into a single cell suspension and cultured in RPMI-1640 (FUJIFILM WAKO) supplemented with

562 15% FBS, 1% penicillin/streptomycin, 2 mM L-glutamine, 0.1 mM non-essential amino acids, and  
563 20 ng/mL mouse macrophage colony stimulating factor (M-CSF) (BioLegend) for 8 days (66).  
564 Dead cells were prepared by 200 J/m<sup>2</sup> of UVC irradiation to fibroblasts using a UV crosslinker  
565 (Analytic Jena). After UV irradiation, cells were cultured for 24 h, and dead cells were collected  
566 and stained using pHrodo (Thermo Fisher Scientific) according to the manufacturer's protocol.  
567 The same amounts of pHrodo-labeled dead cells ( $5 \times 10^5$  cells) were co-incubated with NMR or  
568 mouse bone marrow macrophage culture. After 2 h, phagocytosis was evaluated by measuring  
569 pH-sensitive fluorescence of pHrodo using the BZ-X image analyzer (KEYENCE).  
570

### 571 **RNA-seq analysis**

572 Total RNA was extracted from mouse and NMR skin tissues using TRIzol (Thermo Fisher  
573 Scientific) and purified using the RNeasy Plus Mini Kit (Qiagen). Any contamination with genomic  
574 DNA was removed from total RNA using the RNase-Free DNase Set (Qiagen) according to the  
575 manufacturer's protocol. cDNA libraries were generated from 200 ng total RNA using a TruSeq  
576 stranded mRNA library preparation kit (Illumina). The resultant libraries were sequenced on  
577 NextSeq550 (Illumina) in single-ended mode. Low-quality bases and the adapters in the  
578 sequenced reads were trimmed using Cutadapt (ver.1.14) (67) with Python 2.7.6. The trimmed  
579 reads were mapped to either the mouse (mm10) or NMR (HetGla\_female\_1.0) reference  
580 genome, with the UCSC refGene gtf for mouse and the Ensembl HetGla gtf and previously  
581 published gff (68) for NMR, using STAR (ver.2.4.1d) (69). For identification of DEGs, the uniquely  
582 mapped reads were counted and normalized to calculate fold changes and false discovery rate  
583 (FDR) using HTSeq (ver.0.11.2) (70) and edgeR (ver.3.18.1) (71), with the UCSC refGene gtf for  
584 mouse and the Ensembl HetGla gtf and previously published gff (68) for NMR. Enrichment of  
585 genes in specific cellular functions (GO terms, Reactome, and KEGG pathways) was analyzed  
586 using Metascape (29). The gene expression levels were calculated as transcripts per million  
587 (TPM) using deepTools (ver.2.1.0) (72), and mapping was visualized using the Integrative  
588 Genomics Viewer. The immune enrichment score was analyzed using xCell (28).  
589

### 590 **Western blotting**

591 The skin or cell samples were lysed in cell-lysis buffer (125 mM Tris-HCl, pH 6.8, 4% sodium  
592 dodecyl sulphate [SDS], and 10% sucrose) and boiled for 10 min. Protein concentration was  
593 measured using the BCA Protein Assay Kit (Takara Bio). The protein samples were subjected to  
594 SDS-polyacrylamide gel electrophoresis and transferred to polyvinylidene fluoride membranes  
595 using the Trans-Blot Turbo Transfer System (Bio-Rad). Membranes were probed with antibodies  
596 against MLKL (Abcam, ab184718; 1:1000), pMLKL (Abcam, ab196436; 1:1000), cleaved  
597 caspase-3 (CST, 9664; 1:1000),  $\beta$ -actin (CST, 4970; 1:2000), or vinculin (Sigma-Aldrich, V9131;  
598 1:1000). The membranes were incubated with HRP-conjugated anti-rabbit (CST, 7074; 1:1000) or  
599 HRP-conjugated anti-mouse (CST, 7076; 1:1000) IgG secondary antibodies and visualized using  
600 ECL Prime Western Blotting Detection Reagent (GE Healthcare) and ImageQuant LAS 4000 Mini  
601 (FUJIFILM). The experiments were performed in biological duplicates or triplicates.  
602

### 603 **Statistical analysis**

604 We used GraphPad Prism (GraphPad ver.8) for statistical analysis. The two groups were  
605 analyzed using the two-tailed unpaired *t*-test. For multiple comparisons, the data were analyzed  
606 using one-way analysis of variance (ANOVA), followed by Tukey's multiple comparisons test for  
607 multiple comparisons or by Dunnett's multiple comparisons test. Time to tumor progression was  
608 estimated using Kaplan–Meier curves and was statistically analyzed using the log-rank Mantel–  
609 Cox test or the Gehan–Breslow–Wilcoxon test. Each data point represents the mean  $\pm$  standard  
610 deviation (SD) derived from at least three animals or biological replicates. *P*-values <0.05 were  
611 considered statistically significant.  
612

### 613 **Acknowledgments**

614

615 We thank Drs. H. Niwa, K. Yamagata, K. Seino, and H. Wada for scientific discussions and  
616 administrative support; Ms. Takana Motoyoshi (K.I. Stainer, Kumamoto, Japan) for technical  
617 assistance for immunohistochemistry; M. Kobe, Y. Tanabe, and Y. Fujimura for help with animal  
618 maintenance; and all members of the K.M. Laboratory for technical assistance and scientific  
619 discussions. We thank H. Miyoshi for lentiviral vectors and H. Naka-Kaneda for the pCSII-EF-  
620 RfA-TK-hyg vector. We thank Jane Doe of the Liaison Laboratory Research Promotion Center for  
621 technical support. This work was supported in part by AMED under Grant Numbers  
622 JP21bm0704040 and JP21gm5010001; Grants-in-Aid for Scientific Research from the Japanese  
623 Society for the Promotion of Science from the Ministry of Education, Culture, Sports, Science and  
624 Technology (MEXT) to K.M., Y. Kawamura, and K.O.; JSPS KAKENHI Grant Number JP  
625 16H06276 (AdAMS) to K.O.; and the Tenure-Track Grant of Kumamoto University to Y.  
626 Kawamura. K.M. was supported by the Takeda Science Foundation, KOSÉ Cosmetology  
627 Research Foundation, Kanzawa Medical Research Foundation, Nakatomi Foundation, Naito  
628 Foundation, Foundation for Promotion of Cancer Research, Kato Memorial Bioscience  
629 Foundation, MSD Life Science Foundation, Inamori Foundation, and Frontier Salon Foundation.  
630 The ASHBI is supported by the World Premier International Research Center Initiative (WPI),  
631 MEXT, Japan.

632

### 633 References

- 634 1. B. P. Lee, M. Smith, R. Buffenstein, L. W. Harries, Negligible senescence in naked mole  
635 rats may be a consequence of well-maintained splicing regulation. *GeroScience* **42**, 633–  
636 651 (2020).
- 637 2. J. G. Ruby, M. Smith, R. Buffenstein, Naked mole-rat mortality rates defy Gompertzian  
638 laws by not increasing with age. *Elife* **7**, 1–18 (2018).
- 639 3. R. Buffenstein, Negligible senescence in the longest living rodent, the naked mole-rat:  
640 insights from a successfully aging species. *J. Comp. Physiol. B.* **178**, 439–45 (2008).
- 641 4. M. A. Delaney, L. Nagy, M. J. Kinsel, P. M. Treuting, Spontaneous Histologic Lesions of  
642 the Adult Naked Mole Rat (*Heterocephalus glaber*). *Vet. Pathol.* **50**, 607–621 (2013).
- 643 5. M. A. Delaney, *et al.*, Initial Case Reports of Cancer in Naked Mole-rats (*Heterocephalus*  
644 *glaber*). *Vet. Pathol.* **53**, 691–6 (2016).
- 645 6. K. R. Taylor, N. A. Milone, C. E. Rodriguez, Four cases of spontaneous neoplasia in the  
646 naked mole-rat (*Heterocephalus glaber*), a putative cancer-resistant species. *Journals*  
647 *Gerontol. - Ser. A Biol. Sci. Med. Sci.* **72**, 38–43 (2017).
- 648 7. J. E. Cole, J. C. Steeil, S. J. Sarro, K. L. Kerns, A. Cartoceti, Chordoma of the sacrum of  
649 an adult naked mole-rat. *J. Vet. Diagnostic Investig.* **32**, 132–135 (2020).
- 650 8. A. Seluanov, *et al.*, Hypersensitivity to contact inhibition provides a clue to cancer  
651 resistance of naked mole-rat. *Proc. Natl. Acad. Sci. U. S. A.* **106**, 19352–19357 (2009).
- 652 9. X. Tian, *et al.*, High-molecular-mass hyaluronan mediates the cancer resistance of the  
653 naked mole rat. *Nature* **499**, 346–349 (2013).
- 654 10. S. Miyawaki, *et al.*, Tumour resistance in induced pluripotent stem cells derived from  
655 naked mole-rats. *Nat. Commun.* **7**, 11471 (2016).
- 656 11. S. Liang, J. Mele, Y. Wu, R. Buffenstein, P. J. Hornsby, Resistance to experimental  
657 tumorigenesis in cells of a long-lived mammal, the naked mole-rat (*Heterocephalus*  
658 *glaber*). *Aging Cell* **9**, 626–635 (2010).
- 659 12. F. Hadi, *et al.*, Transformation of naked mole-rat cells. *Nature* **583**, E1–E7 (2020).

- 660 13. J. DiGiovanni, Multistage carcinogenesis in mouse skin. *Pharmacol. Ther.* **54**, 63–128  
661 (1992).
- 662 14. D. Hanahan, R. A. Weinberg, Hallmarks of cancer: The next generation. *Cell* **144**, 646–  
663 674 (2011).
- 664 15. E. Hoste, *et al.*, Innate sensing of microbial products promotes wound-induced skin  
665 cancer. *Nat. Commun.* **6**, 5932 (2015).
- 666 16. T. Bald, *et al.*, Ultraviolet-radiation-induced inflammation promotes angiogenesis and  
667 metastasis in melanoma. *Nature* **507**, 109–113 (2014).
- 668 17. D. Mittal, *et al.*, TLR4-mediated skin carcinogenesis is dependent on immune and  
669 radioresistant cells. *EMBO J.* **29**, 2242–2252 (2010).
- 670 18. H. Oshima, M. Oshima, The inflammatory network in the gastrointestinal tumor  
671 microenvironment: Lessons from mouse models. *J. Gastroenterol.* **47**, 97–106 (2012).
- 672 19. M. E. Choi, D. R. Price, S. W. Ryter, A. M. K. Choi, Necroptosis: a crucial pathogenic  
673 mediator of human disease. *JCI Insight* **4** (2019).
- 674 20. T. H. Schreiber, E. R. Podack, A critical analysis of the tumour immunosurveillance  
675 controversy for 3-MCA-induced sarcomas. *Br. J. Cancer* **101**, 381–386 (2009).
- 676 21. M. B. Shimkin, G. B. Mider, Induction Of Tumors In Guinea Pigs With Subcutaneously  
677 Injected Methylcholanthrene. *JNCI J. Natl. Cancer Inst.* **1**, 707–725 (1941).
- 678 22. I. Manov, *et al.*, Pronounced cancer resistance in a subterranean rodent, the blind mole-  
679 rat, Spalax: in vivo and in vitro evidence. *BMC Biol.* **11**, 91 (2013).
- 680 23. E. L. Abel, J. M. Angel, K. Kiguchi, J. DiGiovanni, Multi-stage chemical carcinogenesis in  
681 mouse skin: Fundamentals and applications. *Nat. Protoc.* **4**, 1350–1362 (2009).
- 682 24. J. Zhang, *et al.*, Fibroblast-specific protein 1/S100A4-positive cells prevent carcinoma  
683 through collagen production and encapsulation of carcinogens. *Cancer Res.* **73**, 2770–  
684 2781 (2013).
- 685 25. K. W. Chung, *et al.*, Molecular insights into SIRT1 protection against UVB-induced skin  
686 fibroblast senescence by suppression of oxidative stress and p53 acetylation. *Journals*  
687 *Gerontol. - Ser. A Biol. Sci. Med. Sci.* **70**, 959–968 (2015).
- 688 26. H. G. Hilton, *et al.*, Single-cell transcriptomics of the naked mole-rat reveals unexpected  
689 features of mammalian immunity. *PLOS Biol.* **17**, e3000528 (2019).
- 690 27. J. A. Ramilowski, *et al.*, A draft network of ligand–receptor-mediated multicellular  
691 signalling in human. *Nat. Commun.* **6**, 7866 (2015).
- 692 28. D. Aran, Z. Hu, A. J. Butte, xCell: Digitally portraying the tissue cellular heterogeneity  
693 landscape. *Genome Biol.* **18**, 1–14 (2017).
- 694 29. Y. Zhou, *et al.*, Metascape provides a biologist-oriented resource for the analysis of  
695 systems-level datasets. *Nat. Commun.* **10**, 1523 (2019).
- 696 30. A. Linkermann, D. R. Green, Necroptosis. *N. Engl. J. Med.* **370**, 455–465 (2014).

- 697 31. S. B. Lee, *et al.*, The AMPK–Parkin axis negatively regulates necroptosis and  
698 tumorigenesis by inhibiting the necrosome. *Nat. Cell Biol.* **21**, 940–951 (2019).
- 699 32. L. Seifert, *et al.*, The necrosome promotes pancreatic oncogenesis via CXCL1 and Mincle-  
700 induced immune suppression. *Nature* **532**, 245–249 (2016).
- 701 33. Y. S. Cho, *et al.*, Phosphorylation-Driven Assembly of the RIP1-RIP3 Complex Regulates  
702 Programmed Necrosis and Virus-Induced Inflammation. *Cell* **137**, 1112–1123 (2009).
- 703 34. S. He, *et al.*, Receptor Interacting Protein Kinase-3 Determines Cellular Necrotic  
704 Response to TNF- $\alpha$ . *Cell* **137**, 1100–1111 (2009).
- 705 35. J. A. Rickard, *et al.*, RIPK1 regulates RIPK3-MLKL-driven systemic inflammation and  
706 emergency hematopoiesis. *Cell* **157**, 1175–1188 (2014).
- 707 36. Y. Dondelinger, P. Hulpiau, Y. Saeys, M. J. M. Bertrand, P. Vandenabeele, An  
708 evolutionary perspective on the necroptotic pathway. *Trends Cell Biol.* **26**, 721–732  
709 (2016).
- 710 37. F. Lejeune, L. E. Maquat, Mechanistic links between nonsense-mediated mRNA decay  
711 and pre-mRNA splicing in mammalian cells. *Curr. Opin. Cell Biol.* **17**, 309–315 (2005).
- 712 38. J. M. Hildebrand, *et al.*, Activation of the pseudokinase MLKL unleashes the four-helix  
713 bundle domain to induce membrane localization and necroptotic cell death. *Proc. Natl.*  
714 *Acad. Sci. U. S. A.* **111**, 15072–15077 (2014).
- 715 39. M. C. Tanzer, *et al.*, Evolutionary divergence of the necroptosis effector MLKL. *Cell Death*  
716 *Differ.* **23**, 1185–1197 (2016).
- 717 40. X. Chen, *et al.*, Translocation of mixed lineage kinase domain-like protein to plasma  
718 membrane leads to necrotic cell death. *Cell Res.* **24**, 105–121 (2014).
- 719 41. A. Degterev, W. Zhou, J. L. Maki, J. Yuan, “Assays for Necroptosis and Activity of RIP  
720 Kinases” in *Regulated Cell Death Part B*, A. Ashkenazi, J. A. Wells, J. B. T.-M. in E. Yuan,  
721 Eds. (Academic Press, 2014), pp. 1–33.
- 722 42. T. H. Lee, *et al.*, The Death Domain Kinase RIP1 Is Essential for Tumor Necrosis Factor  
723 Alpha Signaling to p38 Mitogen-Activated Protein Kinase. *Mol. Cell. Biol.* **23**, 8377–8385  
724 (2003).
- 725 43. Y. Dondelinger, *et al.*, RIPK3 contributes to TNFR1-mediated RIPK1 kinase-dependent  
726 apoptosis in conditions of cIAP1/2 depletion or TAK1 kinase inhibition. *Cell Death Differ.*  
727 **20**, 1381–1392 (2013).
- 728 44. M. Pasparakis, P. Vandenabeele, Necroptosis and its role in inflammation. *Nature* **517**,  
729 311–320 (2015).
- 730 45. P. Mandal, *et al.*, RIP3 Induces Apoptosis Independent of Pronecrotic Kinase Activity. *Mol.*  
731 *Cell* **56**, 481–495 (2014).
- 732 46. R. Altwasser, *et al.*, The transcriptome landscape of the carcinogenic treatment response  
733 in the blind mole rat: Insights into cancer resistance mechanisms. *BMC Genomics* **20**, 1–  
734 15 (2019).

- 735 47. V. Domankevich, H. Eddini, A. Odeh, I. Shams, Resistance to DNA damage and  
736 enhanced DNA repair capacity in the hypoxia-tolerant blind mole rat, *Spalax*. *J. Exp. Biol.*  
737 **221** (2018).
- 738 48. X. Tian, *et al.*, SIRT6 Is Responsible for More Efficient DNA Double-Strand Break Repair  
739 in Long-Lived Species. *Cell* **177**, 622-638.e22 (2019).
- 740 49. A. Evdokimov, *et al.*, Naked mole rat cells display more efficient excision repair than  
741 mouse cells. *Aging (Albany. NY)*. **10**, 1454–1473 (2018).
- 742 50. S. Dadi, *et al.*, Cancer Immunosurveillance by Tissue-Resident Innate Lymphoid Cells and  
743 Innate-like T Cells. *Cell* **164**, 365–377 (2016).
- 744 51. L. A. Kalekar, *et al.*, Regulatory T cells in skin are uniquely poised to suppress profibrotic  
745 immune responses. *Sci. Immunol.* **4**, 1–14 (2019).
- 746 52. J. Xie, *et al.*, Dampened STING-Dependent Interferon Activation in Bats. *Cell Host*  
747 *Microbe* **23**, 297-301.e4 (2018).
- 748 53. D. Jebb, *et al.*, Six reference-quality genomes reveal evolution of bat adaptations. *Nature*  
749 **583**, 578–584 (2020).
- 750 54. T. J. Park, *et al.*, Fructose-driven glycolysis supports anoxia resistance in the naked mole-  
751 rat. *Science*. **356**, 307–311 (2017).
- 752 55. J. Artwohl, *et al.*, Extreme susceptibility of african naked mole rats (*Heterocephalus*  
753 *glaber*) to experimental infection with herpes simplex virus type 1. *Comp. Med.* **59**, 83–90  
754 (2009).
- 755 56. Y. H. Edrey, *et al.*, Amyloid beta and the longest-lived rodent: the naked mole-rat as a  
756 model for natural protection from Alzheimer’s disease. *Neurobiol. Aging* **34**, 2352–2360  
757 (2013).
- 758 57. S. He, X. Wang, RIP kinases as modulators of inflammation and immunity. *Nat. Immunol.*  
759 **19**, 912–922 (2018).
- 760 58. S. Martens, J. Bridelance, R. Roelandt, P. Vandenabeele, N. Takahashi, MLKL in cancer:  
761 more than a necroptosis regulator. *Cell Death Differ.* **28**, 1757–1772 (2021).
- 762 59. A. Avgustinova, *et al.*, Loss of G9a preserves mutation patterns but increases chromatin  
763 accessibility, genomic instability and aggressiveness in skin tumours. *Nat. Cell Biol.* **20**,  
764 1400–1409 (2018).
- 765 60. I. García-Cao, *et al.*, “Super p53” mice exhibit enhanced DNA damage response, are  
766 tumor resistant and age normally. *EMBO J.* **21**, 6225–6235 (2002).
- 767 61. K. Yamakoshi, *et al.*, Real-time in vivo imaging of p16Ink4a reveals cross talk with p53. *J.*  
768 *Cell Biol.* **186**, 393–407 (2009).
- 769 62. T. Nakagawa, *et al.*, Optimum immunohistochemical procedures for analysis of  
770 macrophages in human and mouse formalin fixed paraffin-embedded tissue samples. *J.*  
771 *Clin. Exp. Hematop.* **57**, 31–36 (2017).
- 772 63. J. Cheng, *et al.*, Comparative study of macrophages in naked mole rats and ICR mice.  
773 *Oncotarget* **8**, 96924–96934 (2017).



- 774 64. H. Miyoshi, U. Blömer, M. Takahashi, F. H. Gage, I. M. Verma, Development of a Self-  
775 Inactivating Lentivirus Vector. *J. Virol.* **72**, 8150–8157 (1998).
- 776 65. S. Yamaguchi, *et al.*, Characterization of an active LINE-1 in the naked mole-rat genome.  
777 *Sci. Rep.* **11**, 1–8 (2021).
- 778 66. H. Wada, *et al.*, Flow cytometric identification and cell-line establishment of macrophages  
779 in naked mole-rats. *Sci. Rep.* **9**, 1–12 (2019).
- 780 67. M. Martin, Cutadapt removes adapter sequences from high-throughput sequencing reads.  
781 *EMBnet.journal* **17**, 10 (2011).
- 782 68. M. Bens, *et al.*, Naked mole-rat transcriptome signatures of socially suppressed sexual  
783 maturation and links of reproduction to aging. *BMC Biol.* **16**, 77 (2018).
- 784 69. A. Dobin, *et al.*, STAR: Ultrafast universal RNA-seq aligner. *Bioinformatics* **29**, 15–21  
785 (2013).
- 786 70. S. Anders, P. T. Pyl, W. Huber, HTSeq-A Python framework to work with high-throughput  
787 sequencing data. *Bioinformatics* **31**, 166–169 (2015).
- 788 71. M. D. Robinson, D. J. McCarthy, G. K. Smyth, edgeR: A Bioconductor package for  
789 differential expression analysis of digital gene expression data. *Bioinformatics* **26**, 139–  
790 140 (2009).
- 791 72. F. Ramírez, F. Dündar, S. Diehl, B. A. Grüning, T. Manke, DeepTools: A flexible platform  
792 for exploring deep-sequencing data. *Nucleic Acids Res.* **42**, 187–191 (2014).
- 793

794 **Figures and Tables**

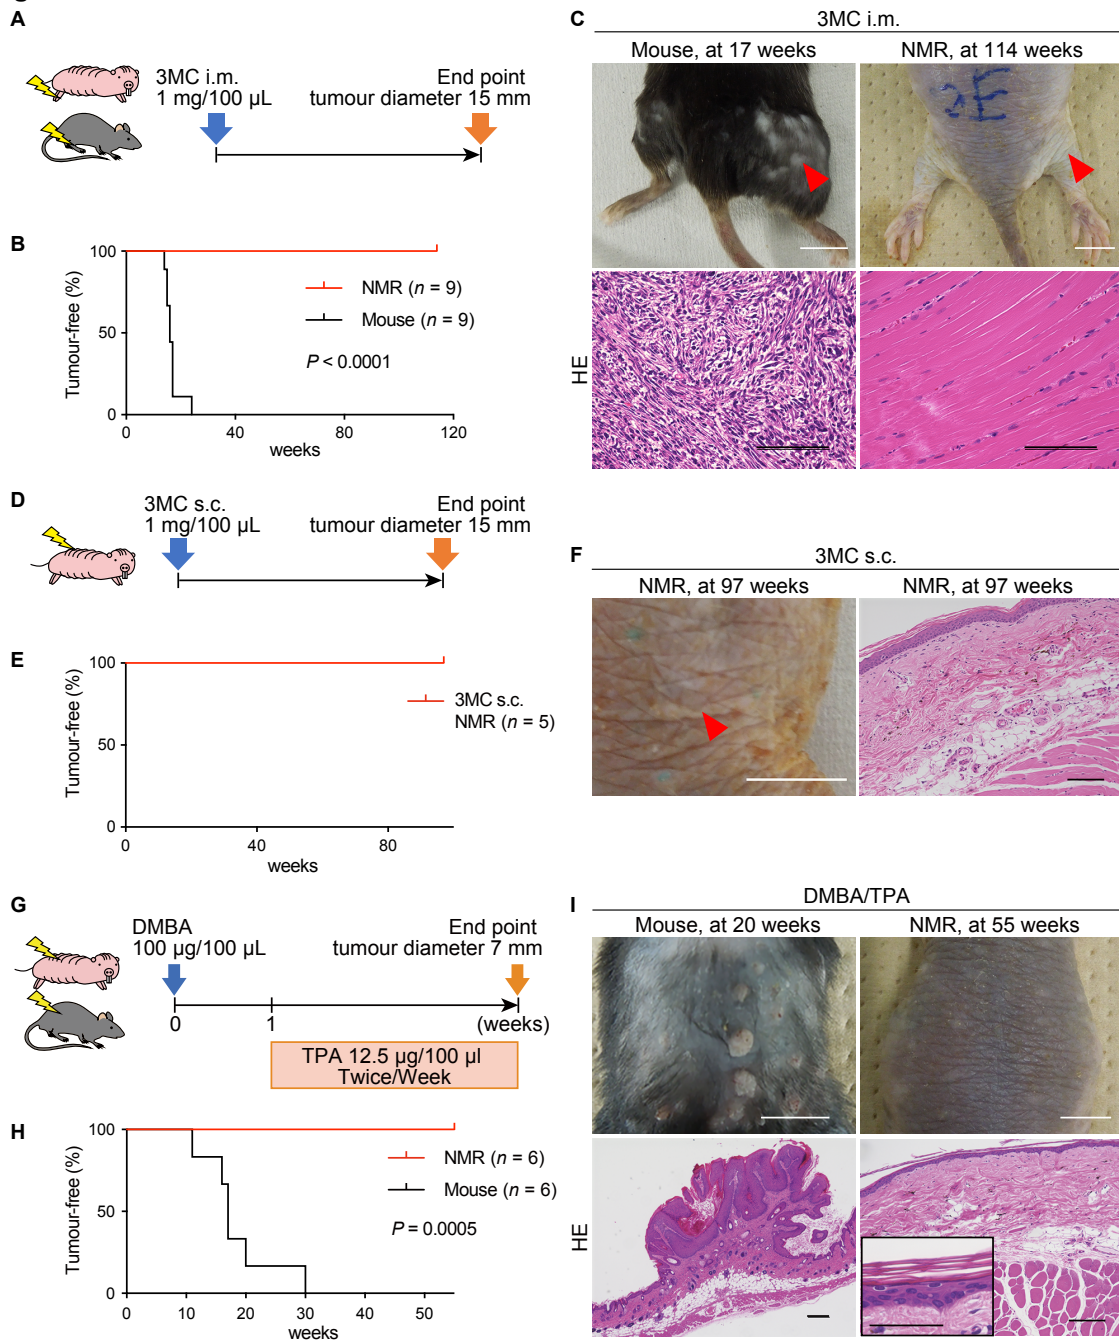

795

796 **Figure 1. Naked mole-rats (NMRs) do not develop tumors in response to two types of**  
 797 **chemical carcinogenesis induction.**

798 **A**, Schematic diagram for carcinogenesis induction by intramuscular (i.m.) injection of 1 mg 3-  
 799 3-methylcholanthrene (3MC) into the hind limb. **B**, Kaplan–Meier curves of tumor-free mice and  
 800 NMRs after i.m. injection of 1 mg 3MC.  $n = 9$  animals per species. **C**, Gross appearance and  
 801 hematoxylin and eosin (HE) staining of a mouse tumor at 17 weeks and NMR muscle at 114  
 802 weeks after i.m. 3MC injection. Red arrows indicate injection sites. Scale bars: 1 cm (upper) and  
 803 50  $\mu$ m (lower). **D**, Schematic diagram for carcinogenesis induction by subcutaneous (s.c.)

804 injection of 1 mg 3MC into the back skin. **E**, Kaplan–Meier curves of tumor-free NMRs after s.c.  
805 injection of 1 mg 3MC.  $n = 5$  animals. **F**, Gross appearance and HE staining of NMR back skin at  
806 97 weeks after s.c. injection of 1 mg 3MC. The red arrowhead indicates the injection site. Scale  
807 bars: 1 cm (gross) and 100  $\mu\text{m}$  (HE).  $n = 5$  animals. **G**, Schematic diagram for carcinogenesis  
808 induction by 7,12-dimethylbenz[*a*]anthracene (DMBA)/12-O-tetradecanoylphorbol-13-acetate  
809 (TPA) treatment on the back skin. **H**, Kaplan–Meier curves of tumor-free mice and NMRs after  
810 starting DMBA/TPA treatment.  $n = 6$  animals per species. **I**, Gross appearance and HE staining of  
811 mouse papillomas at 20 weeks and NMR skin at 55 weeks after starting DMBA/TPA treatment.  
812 Scale bars: 1 cm (upper) and 100  $\mu\text{m}$  (lower). Inset is a higher magnification of NMR skin (scale  
813 bar: 50  $\mu\text{m}$ ). Log-rank test for **B** and **H**.  
814

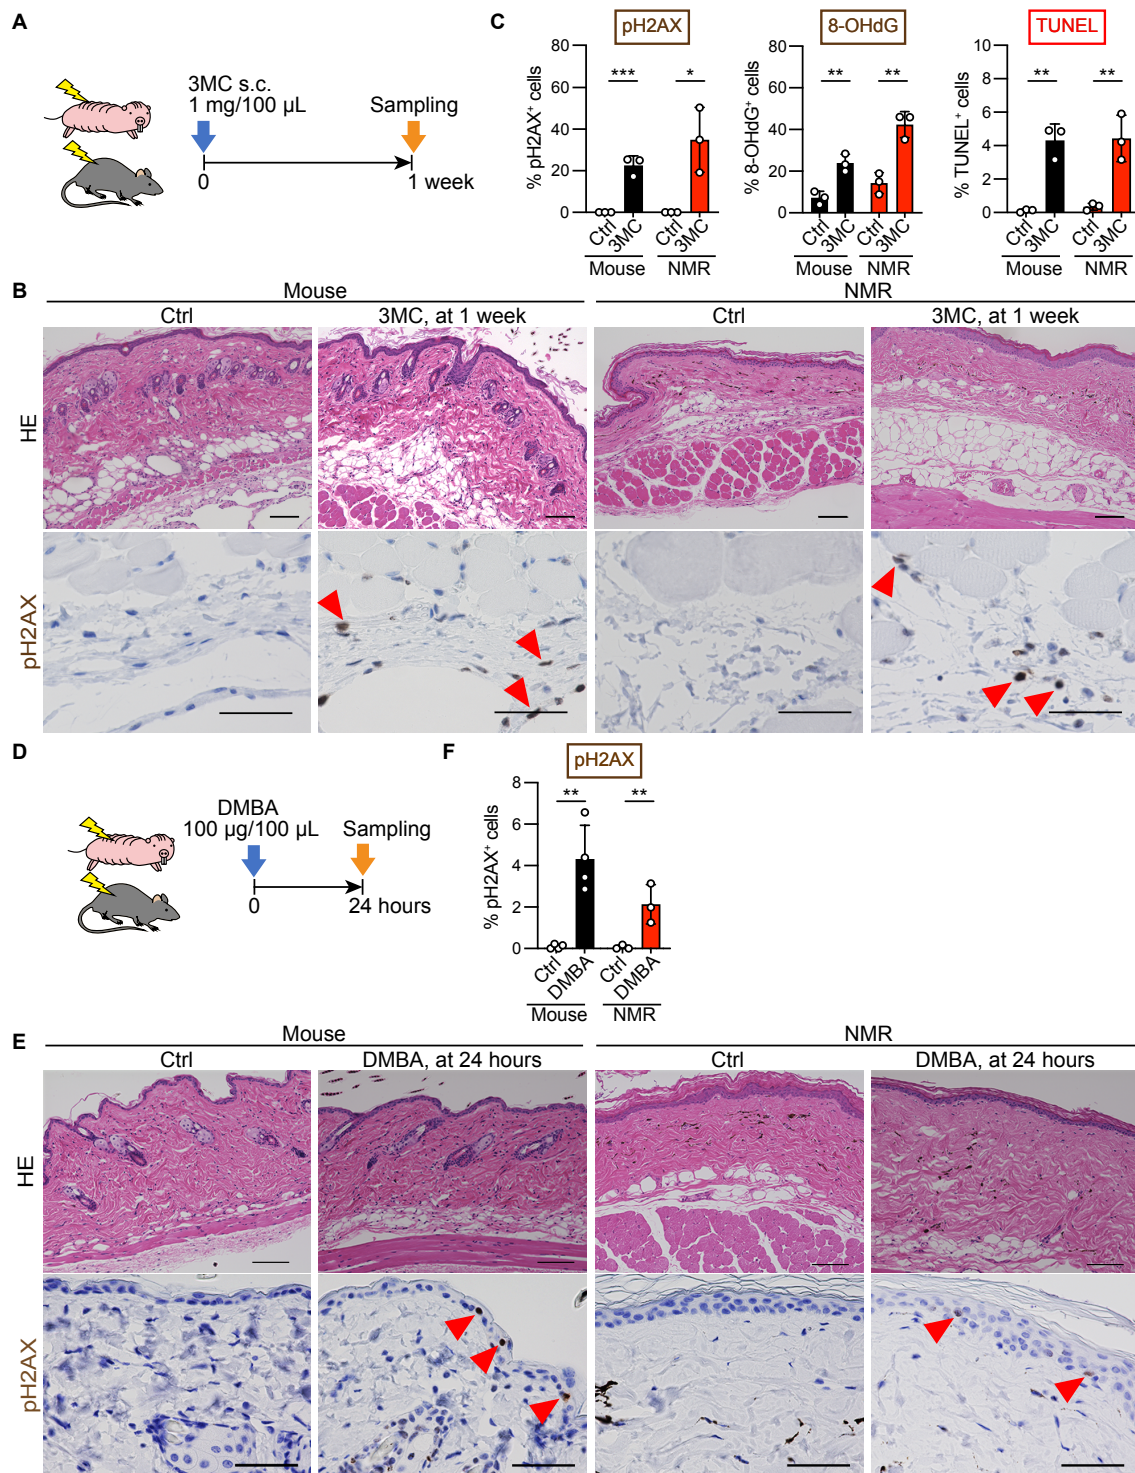

815  
816  
817  
818  
819  
820

**Figure 2. DNA damage and cell death increase in NMRs upon administration of carcinogens.**

**A**, Schematic diagram for investigating short-term responses to 3MC after subcutaneous (s.c.) injection into the back skin. **B**, HE staining and immunohistochemical staining for phospho-histone H2A.X (pH2AX, brown) of the skin of mice and NMRs at 1 week after s.c. injection of

821 3MC. Scale bars: 100  $\mu\text{m}$  (HE) and 50  $\mu\text{m}$  (pH2AX). Red arrowheads indicate positive cells. **C**,  
822 Quantification of pH2AX-, 8-hydroxy-2'-deoxyguanosine (8-OHdG)-, and TUNEL-positive cells  
823 after s.c. injection of 3MC. **D**, Schematic diagram for investigating short-term responses to DMBA  
824 treatment on the back skin. **E**, HE staining and immunohistochemical staining of pH2AX (brown)  
825 in the skin of mice and NMRs at 24 h after DMBA treatment. Scale bars: 100  $\mu\text{m}$  (HE) and 50  $\mu\text{m}$   
826 (pH2AX). Red arrowheads indicate positive cells. **F**, Quantification of pH2AX-positive cells at 24 h  
827 after DMBA treatment. For quantification in **C** and **F**, data are presented as the mean  $\pm$  SD of  $n =$   
828 3–4 animals. Unpaired  $t$ -test versus untreated control (Ctrl).

829

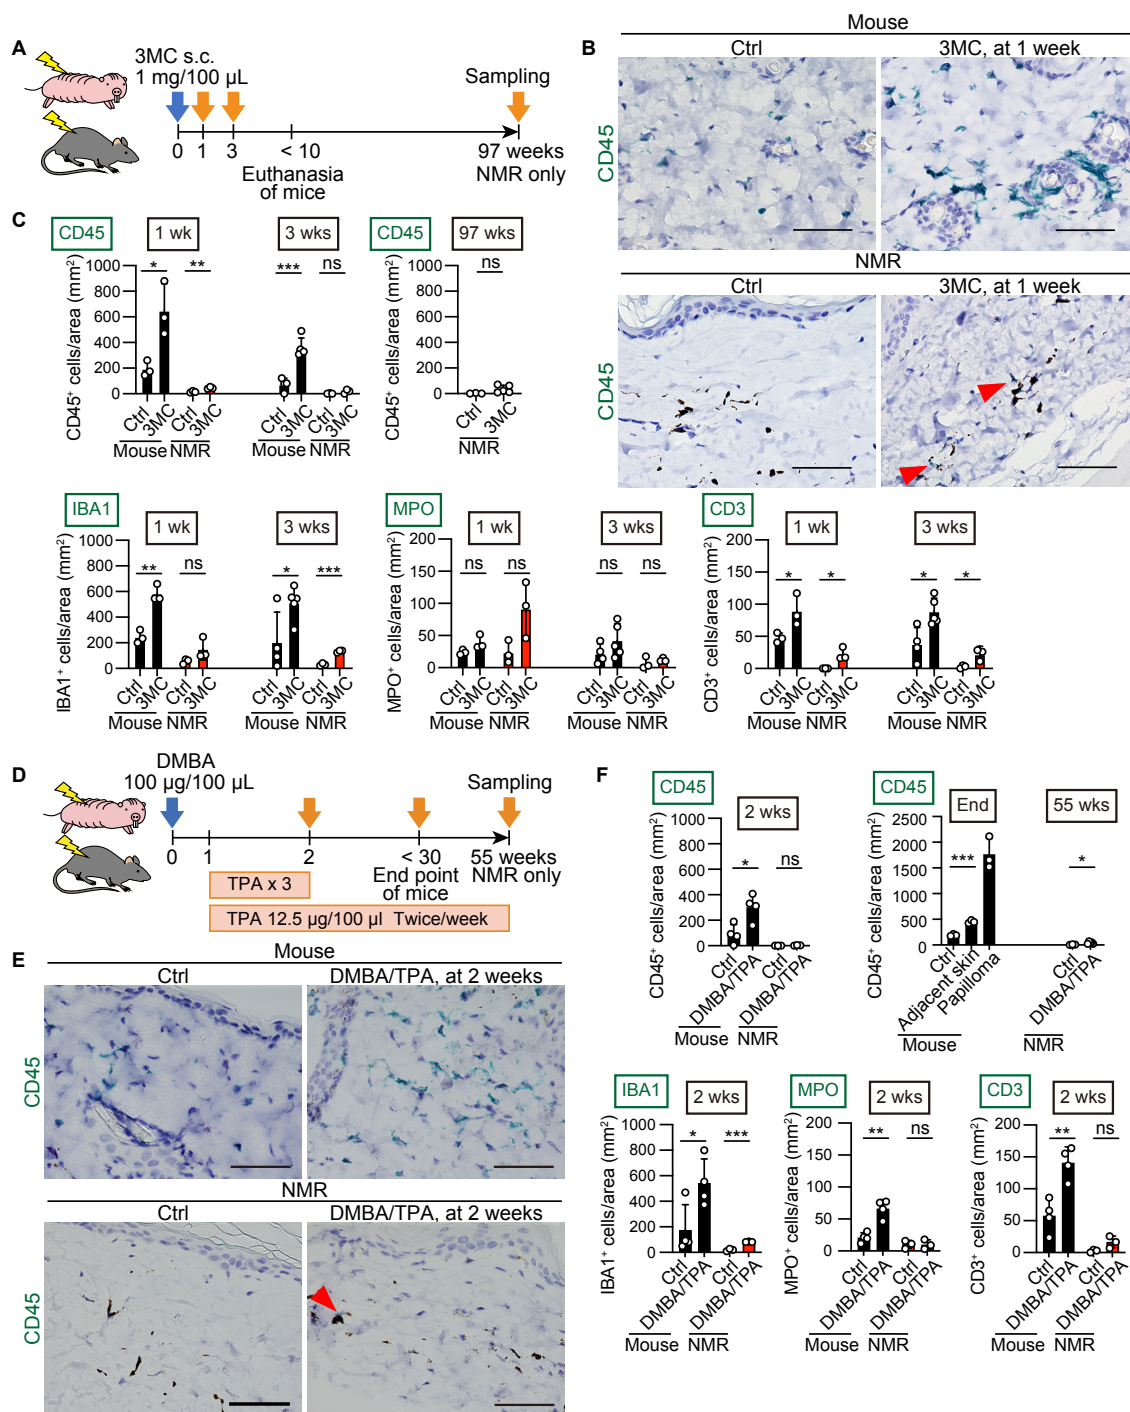

830

831 **Figure 3. NMRs show attenuated infiltration of inflammatory immune cells into tissues**  
 832 **upon administration of carcinogens.**

833 **A**, Schematic diagram for investigating immune cell infiltration into the skin after a subcutaneous  
 834 (s.c.) injection of 3MC. **B**, Immunohistochemical detection of CD45 (green)-positive cells in skin  
 835 sections 1 week after s.c. injection of 3MC. Black dots are melanin pigments in NMR dermis.  
 836 Scale bar: 50 µm. Red arrowheads show positive cells in NMRs. **C**, Quantification of CD45-,  
 837 IBA1-, MPO-, and CD3-positive cells per area in skin sections at 1, 3, and 97 (only for CD45)

838 weeks after s.c. injection of 3MC. **D**, Schematic diagram for investigating immune cell infiltration  
839 into the skin after exposure to DMBA/TPA. **E**, Immunohistochemical detection of CD45 (green)-  
840 positive cells in skin sections at 2 weeks after exposure to DMBA/TPA. Black dots are melanin  
841 pigments in NMR dermis. Scale bar: 50  $\mu$ m. The red arrowhead shows a positive cell in NMRs. **F**,  
842 Quantification of CD45-, IBA1-, MPO-, and CD3-positive cells per area in skin sections at 2 and  
843 55 (only for CD45) weeks after exposure to DMBA/TPA. Mice were analyzed at the end point.  
844 “Adjacent skin” is the no-papilloma region from DMBA/TPA-treated mouse skin. For quantification  
845 in **C** and **F**, data are presented as the mean  $\pm$  SD of  $n = 3-5$  animals. Unpaired  $t$ -test versus  
846 untreated control (Ctrl).  
847

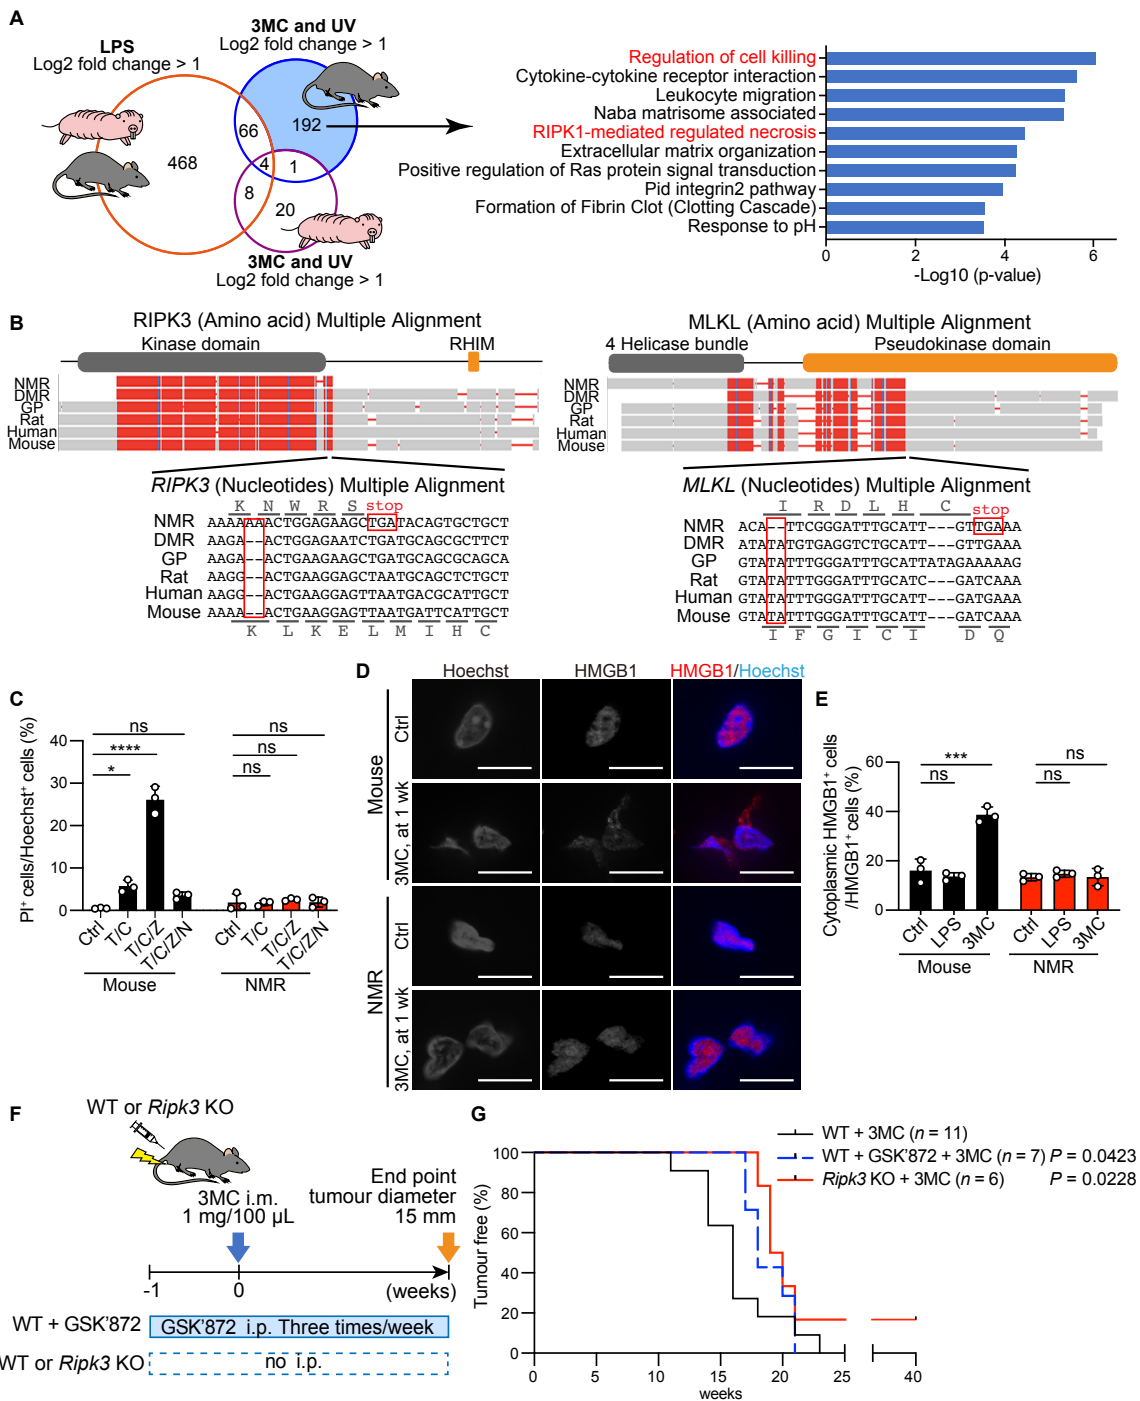

848  
849  
850  
851  
852  
853  
854  
855  
856

**Figure 4. Loss of necroptosis regulators may contribute to an attenuated tissue inflammatory response and resistance to carcinogenesis in NMR individuals.** **A**, Venn diagram showing the number of genes upregulated in both mouse and NMR skin upon lipopolysaccharide (LPS) treatment; genes upregulated specifically in mouse or NMR skin upon exposure to 3MC (1 week) and UV; and enriched pathways of 3MC-UV Mouse-DEGs. **B**, Multiple alignments of receptor-interacting kinase 3 (*RIPK3*) and mixed lineage kinase domain-like (*MLKL*) sequences from the NMR, Damaraland mole-rat (DMR), guinea pig (GP), rat, human, and mouse. Frame-shift mutations and premature stop codons in the NMR sequence are boxed. Reading



857 frames for the NMR and mouse sequences are indicated. The functional domains are shown  
858 above the alignments. **C**, Cell death analysis in fibroblasts treated with a combination of TNF- $\alpha$   
859 (T), cycloheximide (C), z-VAD-fmk (Z), or Nec-1 (N). Data are presented as the mean  $\pm$  SD of  $n =$   
860 3 independent experiments. **D**, Immunofluorescence staining of high mobility group box-1 protein  
861 (HMGB1, red) in skin at 1 week after 3MC-injection. Nuclei: blue. Scale bar: 10  $\mu$ m. **E**,  
862 Quantification of cytoplasmic HMGB1 in skin after each treatment. Data are presented as the  
863 mean  $\pm$  SD of  $n = 3$  animals for each species. One-way ANOVA with Tukey's multiple  
864 comparison test for **C** and Dunnett's multiple comparisons test versus untreated control (Ctrl) for  
865 **E**. **F**, Schematic diagram for carcinogenesis induction by intramuscular (i.m.) injection of 3MC  
866 with intraperitoneal (i.p.) injection of GSK'872 in mice or i.m. injection of 3MC in *Ripk3* knockout  
867 (KO) mice. **G**, Kaplan–Meier curves of tumor-free mice ( $n = 11$  [for wild-type, WT],  $n = 7$  [for  
868 GSK'872], or  $n = 6$  [for *Ripk3* KO] animals).  $P = 0.0423$  for GSK'872 and  $P = 0.0228$  for *Ripk3*  
869 KO; Gehan–Breslow–Wilcoxon test.
